# Supplementary material for: Identification of gross deletions in FBN1 gene by MLPA
Source: PubMed Central journal article supplement (PMC6172713; doi:10.1186/s40246-018-0178-y), 2018-10-04
Supplement: 40246_2018_178_MOESM1_ESM.pdf [file 40246_2018_178_MOESM1_ESM.pdf]

Table S1. The quantitative PCR primer pairs for AD437

| Primer target    | Primer name | Primer sequence          | Product size |
|------------------|-------------|--------------------------|--------------|
| <i>FBNI-EX55</i> | EX55-F      | TAAATGAATGTGCCCAGAATCC   | 139bp        |
|                  | EX55-R      | CTTGAACACGATGACTCACCTT   |              |
| <i>FBNI-EX66</i> | EX66-F      | CGAATCACAACAGATACTTGATCG | 228bp        |
|                  | EX66-R      | TCTTCAGATTATCACCCAGTTCAC |              |
| <i>GAPDH</i>     | GAPDH-Q-F   | CTATAAATTGAGCCCAGCC      | 152bp        |
|                  | GAPDH-Q-R   | GCCCAATACGACCAAATCCGT    |              |
